1 **Species-level resolution of 16S rRNA gene amplicons sequenced**  
2 **through the MinION™ portable nanopore sequencer**

3 **Alfonso Benítez-Páez<sup>\*</sup>, Kevin J. Portune, Yolanda Sanz**

4

5 Microbial Ecology, Nutrition & Health Research Unit. Institute of Agrochemistry and  
6 Food Technology Institute, National Research Council (IATA-CSIC), Valencia, Spain.

7

8

9 <sup>\*</sup>Corresponding author

10 C. Catedràtic Agustín Escardino Benlloch, 7.

11 46980 Paterna-Valencia

12 Spain

13 Tel: +34 963 900 022 ext. 2129.

14 Email: [abenitez@iata.csic.es](mailto:abenitez@iata.csic.es).

15

16

17 **Abstract**

18 **Background:** The miniaturised and portable DNA sequencer MinION™ has been  
19 released to the scientific community within the framework of an early access  
20 programme to evaluate its application for a wide variety of genetic approaches. This  
21 technology has demonstrated great potential, especially in genome-wide analyses. In  
22 this study, we tested the ability of the MinION™ system to perform amplicon  
23 sequencing in order to design new approaches to study microbial diversity using nearly  
24 full-length 16S rDNA sequences.

25 **Results:** Using R7.3 chemistry, we generated more than 3.8 million events (nt) during a  
26 single sequencing run. These data were sufficient to reconstruct more than 90% of the  
27 16S rRNA gene sequences for 20 different species present in a mock reference  
28 community. After read mapping and 16S rRNA gene assembly, consensus sequences  
29 and 2d reads were recovered to assign taxonomic classification down to the species  
30 level. Additionally, we were able to measure the relative abundance of all the species  
31 present in a mock community and detected a biased species distribution originating  
32 from the PCR reaction using ‘universal’ primers.

33 **Conclusions:** Although nanopore-based sequencing produces reads with lower per-base  
34 accuracy compared with other platforms, the MinION™ DNA sequencer is valuable for  
35 both high taxonomic resolution and microbial diversity analysis. Improvements in  
36 nanopore chemistry, such as minimising base-calling errors and the nucleotide bias  
37 reported here for 16S amplicon sequencing, will further deliver more reliable  
38 information that is useful for the specific detection of microbial species and strains in  
39 complex ecosystems.

40

41 **Keywords:** MinION; Nanopore sequencer; 16S rDNA amplicon sequencing; Microbial

42 diversity; Long-read sequencing.

43

## 44 **Background**

45 The third generation of DNA sequencers is based on single-molecule analysis  
46 technology that constantly is under development to minimise errors and produce high  
47 quality reads. Oxford Nanopore Technologies (ONT) released the first miniaturised and  
48 portable DNA sequencer to researchers in early 2014, within the framework of the  
49 MinION™ Access Programme. The MinION™ is a USB stick-sized device operated  
50 from a computer via USB 3.0. Real-time data analysis can be visualised in terms of  
51 number of reads and length distribution. Nucleotide base-calling and quality assessment  
52 of reads require further processing, where data exchange of Hierarchical Data Format  
53 (HDF5) files, containing a large amount of numerical data, is indispensable. This data  
54 exchange is done via the Internet through the Metrichor platform; a process that can  
55 optionally be launched after the sequencing process itself. According to its theoretical  
56 capabilities, the MinION™ provides new alternatives for genomic analyses. One of the  
57 most attractive capabilities of the MinION™ platform is the sequencing of complete  
58 bacterial genomes, as demonstrated recently by Quick et al. [1]. Another major  
59 advantage of the MinION™ platform, compared to other popular sequencing  
60 technologies, is its performance in terms of read length. Theoretically, nanopore-sensing  
61 technology is able to generate thousands of reads that are hundreds to thousands of  
62 nucleotides in length; the only limitation being the DNA fragments generated during  
63 nucleic acid extraction procedures, which frequently produce fragmented DNA with an  
64 average length of 50kb. Although short-read length sequencing approaches deliver high  
65 quality sequences, these partial genome sequences with unsolved repetitive elements  
66 make it impossible to study genetic variation or molecular evolution directly or  
67 indirectly associated to such elements. Therefore, long-read approaches offer new  
68 insights into genomic analysis, facilitating the assembly of complete genomes through

69 hybrid strategies [2]. In addition to genome sequencing analysis, microbial diversity and  
70 taxonomic approaches are also deeply limited by short-read strategies. Early massive  
71 sequencing approaches producing 50 nt (Genome Analyzer, Solexa/Illumina) to 200 nt  
72 (454 Roche) effective reads with a modest average quality only allowed accurate  
73 exploration of diversity at the phylum level. However, thanks to improvements in the  
74 chemistry of the most common, popular sequencing platforms in recent years, it is now  
75 possible to characterise microbial communities in detail down to the family or even  
76 genus level. To date, paired-end short read approaches for massive sequencing permit  
77 the analysis of sequence information of roughly 30% (~500nt) of the full 16S rRNA  
78 gene, which means taxonomic assignment of reads at the species level is elusive.  
79 Therefore, implementation of long-read sequencing approaches to study 16S rRNA  
80 genes will permit the design of new studies to provide evidence for the central role of  
81 precise bacterial species/strains in a great variety of microbial consortia. As a  
82 consequence, we present a preliminary study of 16S rDNA amplicon sequencing of a  
83 mock microbial community composed of genomic DNA from 20 different bacterial  
84 species (BEI Resources) using the MinION<sup>TM</sup> sequencing platform. The aim of this  
85 study is to evaluate the application of nanopore technology in performing bacterial  
86 diversity and taxonomic analysis on nearly full-length bacterial 16S rRNA genes.

87

## 88 **Data description**

89 Raw data collected in this experiment were obtained as fast5 files using MinKNOW  
90 software v0.50.1.15 (Oxford Nanopore Technologies), after conversion of electric  
91 signals into base calls via the Metrichor Agent v2.29 and the 2D Basecalling workflow  
92 v1.16. Base-called data passing quality control and filtering were downloaded and basic  
93 statistical analysis was carried out using *poretools* [3] and *poRe* [4]. Mapping statistics

94 are depicted in Table 1. Fast5 raw data can be accessed at the European Nucleotide  
95 Archive (ENA) under the project ID PRJEB8730 (sample ERS760633). Only one data  
96 set was generated after a sequencing run of MinION™.

97

## 98 **Analyses**

99 DNA reads derived from MinION sequencing can be classified into three types:  
100 ‘template’, ‘complement’, and ‘2d’ reads. While template reads come from DNA  
101 strands that are primed by a leader adapter and passed through the pore, the complement  
102 reads are generated only if a second adapter (hairpin adapter) is present in the same  
103 DNA fragment, thus permitting sequencing both strands of a single molecule in a  
104 concatenated manner. The 2d reads are products of aligning and merging sequences  
105 from template and complement reads generated from the same DNA fragment: these  
106 contain a lower error rate, owing to strand comparison and mismatch correction. After  
107 the sequencing process, we obtained 3,404 reads, of which 58.5% were template reads  
108 (1,991), 23.8% were complement reads (812), and 17.7% were 2d reads (601). Read  
109 lengths had a wide distribution ranging from 12 nt to more than 50,000 nt in length,  
110 with a median of 1,100 nt. We hypothesised that extremely large reads might be  
111 products of the ligation of multiple amplicons. However, when we tried to align these  
112 large reads to reference sequences, we detected no matches (data not shown).  
113 Accordingly, a filtering step was performed by retaining 97% of the original dataset  
114 (3,297 reads), with a size range between 100 and 2,000nt in length for downstream  
115 analysis.

116 In the first step of our analysis, we used the large set of template and complement reads  
117 to assess the global performance of the amplicon sequencing process. Consequently, we  
118 analysed basic read-mapping statistics to uncover potential pitfalls of the MinION

119 platform and tried to reconstruct the reference sequences. We assembled more than 90%  
120 of 16S rRNA gene sequences for all organisms included in the mock community  
121 (Table1). We observed that even at very low coverage, such as that retrieved for the  
122 *Bacteroides vulgatus* 16S rRNA gene (Figure 1), it is possible to reconstruct almost  
123 93% of the entire gene. Indeed, the maximum size of amplicons sequenced in all cases  
124 was close to the expected amplicon size according to the universal primers used in the  
125 PCR design (Table 1). In terms of coverage, we hypothesised that the lower than  
126 expected number of 16S reads from *B. vulgatus* species (Figure 1) resulted from a bias  
127 caused during PCR amplification, despite using high coverage primers [5, 6], or as a  
128 result of the sequencing process itself. To further investigate this matter, we performed  
129 an absolute quantification of 16S rRNA genes using qPCR from three different species  
130 with a high coverage, close-to-expected coverage, and the lowest coverage,  
131 respectively, which were present in the initial PCR sample used for library construction  
132 and sequencing. A correlation between the number of molecules present in the starting  
133 material and the coverage obtained after the sequencing process (Pearson's  $r = 0.99$ ,  
134  $p \leq 0.0514$ ) was detected (Figure 2), indicating that the sequencing process faithfully  
135 reproduced the proportion of amplicons present in the sample and the coverage bias was  
136 therefore derived from the starting material generated by PCR. Despite this bias, the  
137 16S rRNA gene from *B. vulgatus* was fully assembled with low variation ( $25/1,403 =$   
138  $1.78\%$ ) after DNA read alignment and pileup (Table 1).

139 Read-mapping statistics were analysed to further measure the performance of  
140 MinION<sup>TM</sup> sequencing in microbial diversity analysis based on 16S rDNA sequences.  
141 The GC content of reads produced by MinION<sup>TM</sup> showed an important and significant  
142 correlation (Pearson's  $r = 0.47$ ,  $p \leq 0.0376$ ) against the GC content of reference values  
143 (Figure3A), which indicates that the GC content of 16S rDNA sequences is fairly well

144 replicated during sequencing. However, we found a 16S rDNA GC content bias, to  
145 some extent, in the reads obtained from MinION™, which in almost all cases exceeds  
146 the GC content of the reference (Figure 3A). To test the probable influence of GC  
147 content bias in base-calling accuracy, we performed linear comparisons against  
148 mismatch rates, indel rates, and coverage deviation. We observed that both coverage  
149 deviation ( $p \leq 0.00003$ ) and mismatch rate ( $p \leq 0.00004$ ) are significantly influenced by  
150 read GC content (Figure 3B and 3C, respectively). In the first case, the influence of GC  
151 content on coverage deviation could have a minimal effect because 95% of species  
152 analysed show no more than a one-fold deviation. However, with GC bias detected in  
153 reads from the MinION™ sequencer, this effect could be magnified, especially in  
154 species where GC content is high. On the other hand, we found a strong correlation  
155 between the GC content of reads and the mismatch rate retrieved from alignments,  
156 which would insinuate again that GC content is a factor that influences 16S rDNA  
157 amplicon sequencing in the MinION™ platform. Conversely, GC content did not  
158 appear to profoundly affect indel rate (Figure 3D).

159 The complete assembly of the amplified 16S rRNA gene permitted the quantification of  
160 the level of sequence variants in the consensus sequence. These variants were recovered  
161 after a pileup of reads against reference sequences, and they were variable in number  
162 with a median of 8 variants per 16S rRNA gene (Table 1). This number of nucleotide  
163 substitutions means that approximately 0.5% of the 16S rDNA sequence assembled  
164 from MinION™ reads retained unnatural genetic variants directly generated from the  
165 sequencing process itself, theoretically allowing a bona fide identification and  
166 taxonomic assignment of 16S rDNA sequences at the species level. In the worst cases,  
167 where the number of variants were meaningful (~2.3% of the full assembly), such as  
168 those observed for *Acinetobacter baumannii* and *Bacillus cereus* (Table 1), direct



169 BLAST comparisons of these assembled 16S rDNA sequences against the NCBI 16S  
170 database only produced matches with homologous sequences belonging to the same  
171 species, respectively (data not shown).

172 A final step in our analysis tested whether or not the information obtained through  
173 sequencing of nearly full-size 16S rRNA genes using the MinION™ platform is useful  
174 to perform taxonomic assignment with tools commonly employed in microbial  
175 community analysis. For this aim, we used the information derived from 2d reads (601  
176 reads), which is limited in terms of the effective number of reads but more reliable in  
177 terms of sequence identity. Using the SINA web service [7] we obtained the taxonomic  
178 assignment of 2d reads to the Silva bacterial 16S database [8]. The results of this  
179 approach are shown in Table 2. Out of the 17 different genera present in the mock  
180 community, we retrieved information for six of them, with an assignment threshold of  
181 80%, seven with 70% and eight with 60%. Using 60% as the lowest assignment  
182 threshold, we started to retrieve unexpected genera composition in our 2d data set,  
183 indicating that reliable identifications must be set with a higher identity threshold. As  
184 expected, taxonomy assignment was limited to those species with a higher coverage  
185 during sequencing processing (Figure 1), which is consistent with the number of 2d  
186 reads expected after aligning and merging respective template and complement reads  
187 obtained from the 16S rRNA genes of species over-represented in the starting material.  
188 We expect that the whole repertoire of species present in the sample can be detected by  
189 increasing the performance of the sequencing process. This would allow us to obtain a  
190 larger raw dataset and, particularly, more 2d reads containing more reliable information  
191 to perform taxonomic assignments and disclose the full inventory of species present in  
192 the microbial community under study. Finally, a BLAST-based assignment against the  
193 NCBI bacterial 16S rRNA gene database retrieved the identities of 8 of the 20 species

194 presented in the mock community analysed (Table 2). Although other species were also  
195 retrieved, they exhibited a high level of affiliation in terms of the 16S rDNA sequence  
196 identity to the true species included in the mock community.

197

## 198 **Discussion**

199 The inventory of microbial species based on 16S rDNA sequencing is frequently used in  
200 biomedical research to determine microbial organisms inhabiting the human body and  
201 their relationship with disease. Identification of microbial species inhabiting different  
202 areas and cavities of the human body currently relies on the handling and processing of  
203 millions of DNA sequences obtained through the second generation of massive and  
204 parallel sequencing methods. However, these methods are still limited, mainly in terms  
205 of DNA read length. The inability to determine complete 16S rDNA sequences during  
206 massive sequencing has led to the development of multiple algorithms dedicated to  
207 theoretically discerning microbial species present in samples according to the sequence  
208 similarity degree, or Operational Taxonomic Units (OTUs). Despite high accuracy and a  
209 constant update of the methods used in OTU-based approaches, available algorithms  
210 produce no consensus outputs, leaving a high degree of uncertainty when the number of  
211 theoretical species and their abundance is the subject of study [9-12].

212 Thanks to the fact that they overcome DNA read limitations at the expense of  
213 decreasing throughput, a third generation of sequencing methods based on single-  
214 molecule technology offers new possibilities to study microbial diversity and taxonomic  
215 composition. MinION<sup>TM</sup> is one of these single-molecule methodologies, which has  
216 demonstrated its capacity in genome sequencing [1, 13]. Recent studies have reported  
217 the application of this technology in medical microbiology by using amplicon  
218 sequencing to determine bacterial and viral infections [14, 15]. Our results indicate that

219 the MinION™ per-base accuracy (65–70% for template reads, and 85% for 2d reads) is  
220 in concordance with previous results [1, 14, 16]. We found that sequence coverage was  
221 close to expected values in most cases, with the exception of that of *B. vulgatus* (gene  
222 GC = 52%), which was 1.84-fold less than the expected coverage. Using absolute  
223 quantification of molecules presented in the starting material, we demonstrated that such  
224 coverage bias came from the PCR process used to generate the 16S amplicons, despite  
225 using ‘universal’ primers with higher coverage among bacterial species [5]. Despite  
226 this, such coverage was enough to reconstruct 93% of the 16S rRNA gene of *B.*  
227 *vulgatus* with a low proportion of unnatural variants.

228 We observed a general influence of GC content in the mismatch rate but not in the indel  
229 rate. This suggests that base miscalling could be associated with the amplicon GC  
230 content. Moreover, a slight correlation between the amplicon GC content observed and  
231 coverage bias was evidenced, indicating that GC content could be negatively affecting  
232 amplicon coverage to some extent. Although MinION™ was able to replicate the GC  
233 content expected for every amplicon sequenced fairly well, we observed a slight over-  
234 representation of GC in all reads obtained. This over-calling of GC bases in 16S rDNA  
235 amplicons could additionally influence the issues stated above in a negative manner.

236 The R7.3 chemistry used in MinION™ allowed the acquisition of reads of moderate  
237 quality, which were enough to reconstruct more than 90% of the 16S rRNA gene in all  
238 20 bacterial species analysed. None of the 20 16S rDNA consensus sequences  
239 assembled showed more than 3% of sequence variation, which can be considered as a  
240 threshold for canonical species identification. Therefore, the consensus sequence  
241 assembled was useful to obtain a reliable taxonomic identification at the species level.  
242 As expected, unnatural variants were associated with low coverage regions. Therefore,  
243 increasing the sequencing coverage will drastically reduce the ambiguities of the

244 assembled sequences. When we tested the high quality reads (2d) in common routines  
245 for the analysis of microbial communities, the SINA web server retrieved a taxonomic  
246 assignment, indicating the presence of 7 genera out of the 17 expected for the mock  
247 community without any mismatches (using 70% sequence identity as a threshold).  
248 Although this number of matches can be considered low, it was directly associated with  
249 the sequencing coverage, therefore, a larger 2d data set generated from a greater  
250 sequencing effort would produce enough information to identify the entire community.  
251 In terms of the study of microbial communities, results obtained using 16S rDNA  
252 amplicon sequencing through the MinION™ device are promising. Despite the  
253 observed modest per-base accuracy of this sequencing platform, we were able to  
254 reconstruct nearly full-length 16S rDNA sequences for 20 different species analysed  
255 from a mock bacterial community, and were able to obtain an acceptable taxonomy  
256 assignment for high quality 2d reads, only limited by the sequencing effort. This seems  
257 to be the major handicap of the MinION™ platform for microbial diversity analysis. To  
258 date, MinION™ and nanopore technologies have demonstrated great potential in DNA  
259 sequencing by allowing the retrieval of whole bacterial genome sequences with a  
260 minimum level of variation [1]. With the results presented here, we postulate that the  
261 MinION™ platform is a reliable methodology to study the diversity of microbial  
262 communities. It permits: i) a taxonomic identification at the species level through 16S  
263 rDNA sequence comparisons, and ii) a relative quantification to determine the species  
264 abundance. This type of analysis will likely become more accurate over time as  
265 nanopore chemistry is improved in future releases, with the concomitant increasing of  
266 the throughput, pivotal to disclose the hundreds of species present in complex microbial  
267 communities. The implementation of the “What’s In My Pot” (WIMP) Metrichor  
268 workflow, which aims to acquire real-time taxonomic sequence identification by

269 comparing against different bacterial references databases (i.e. NCBI, SILVA [8],  
270 GreenGenes [17]), will be helpful in other types of analyses related to those presented  
271 here. Accordingly, sequence studies of the entire 16S rDNA molecule could allow  
272 OTU-based analysis to be bypassed completely, thus making it feasible to obtain a  
273 direct inventory of bacterial species and relative abundance, as well as to determine the  
274 key players at the species level in different microbial communities of interest.

275

## 276 **Methods**

### 277 *Bacterial DNA and 16S rDNA amplicons*

278 Genomic DNA for the reference mock microbial community was kindly donated by  
279 BEI Resources [18]. This mock community (HM-782D) is composed of a genomic  
280 DNA mix from 20 bacterial strains containing equimolar ribosomal RNA operon counts  
281 (100,000 copies per organism per  $\mu\text{L}$ ), as indicated by the manufacturer. According to  
282 instructions provided by BEI Resources, 1  $\mu\text{L}$  of mock community DNA was used to  
283 amplify 16S rRNA genes. DNA was amplified by 30 PCR cycles at 95°C for 20 s, 47°C  
284 for 30 s, and 72°C for 60 s. Phusion High-Fidelity Taq Polymerase (Thermo Scientific)  
285 and the primers S-D-Bact-0008-c-S-20 and S-D-Bact-1391-a-A-17, which target a wide  
286 range of bacterial 16S rRNA genes, were used during PCR [5, 6]. Amplicons consisted  
287 of ~1.5kbp blunt-end fragments, which were purified using the Illustra GFX PCR DNA  
288 and Gel Band Purification Kit (GE Healthcare). Amplicon DNA was quantified using a  
289 Qubit 3.0 fluorometer (Life Technologies).

290

### 291 *Amplicon DNA library preparation*

292 The Genomic DNA Sequencing Kit SQK-MAP-005 was used to prepare the amplicon  
293 library to be loaded into the MinION<sup>TM</sup>. Approximately 250 ng of amplicon DNA (0.25

294 pmol) was processed for end repair using the NEBNext End Repair Module (New  
295 England Biolabs), followed by purification using Agencourt AMPure XP beads  
296 (Beckman Coulter). Subsequently, according to the manufacturer's instructions, we  
297 used 200 ng of the purified amplicon DNA (~0.2 pmol) to perform dA-tailing using the  
298 NEBNext dA-tailing module (New England Biolabs) with a total volume of 30  $\mu$ L, and  
299 incubated the sample at 37°C for 15 minutes. Fifty  $\mu$ l of Blunt/TA ligase master mix  
300 (New England Biolabs), 10  $\mu$ L of adapter mix, and 2  $\mu$ L of HP adapter were added to  
301 the 30  $\mu$ l dA-tailed amplicon DNA. The reaction was incubated at 16°C for 15 minutes.  
302 The adapter-ligated amplicon was recovered using Dynabeads® His-Tag (Life  
303 Technologies) and washed with washing buffer provided with the Genomic DNA  
304 Sequencing Kit SQK-MAP-005 (Oxford Nanopore Technologies). Finally, the sample  
305 was eluted from the Dynabeads® by adding 25  $\mu$ L of elution buffer and incubating for  
306 10 minutes at room temperature before pelleting in a magnetic rack.

307

#### 308 *Flowcell set-up*

309 A brand new, sealed R7.3 flowcell was stored at 4°C before first use. It was fitted to the  
310 MinION™ with plastic screws, ensuring a good thermal contact. The R7.3 flowcell was  
311 primed twice using 71  $\mu$ L premixed nuclease-free water, 75  $\mu$ L 2x running buffer, and  
312 4 $\mu$ L fuel mix. At least 10 minutes were needed to equilibrate the flowcell before each  
313 round of priming and before final DNA library loading.

314

#### 315 *Amplicon DNA sequencing*

316 The sequencing mix was prepared with 63  $\mu$ l nuclease-free water, 75  $\mu$ l 2x running  
317 buffer, 8  $\mu$ L DNA library, and 4  $\mu$ L fuel mix. A standard 48-hour sequencing protocol  
318 was initiated using the MinKNOW™ v0.50.1.15. Base-calling was performed through

319 data transference using the Metrichor™ agent v2.29.1 and 2D base-calling workflow  
320 v1.16. During the sequencing run, one additional freshly diluted aliquot of DNA library  
321 was loaded after 12 hours of initial input.

322

### 323 *Data analysis*

324 Quality assessment of read data and conversion to fasta format was performed using the  
325 *poretools* [1] and *poRe* [4] packages. Fasta sequences were filtered by retaining those  
326 with a length between 100 and 2000 nt. Read-mapping was performed against the 16S  
327 ribosomal RNA sequences for the species present in the mock community (see  
328 Availability of supporting data).

329 Read-mapping was performed using the LAST aligner v.189 [19] with parameters -q1 -  
330 b1 -Q0 -a1 -e45, which were configured to give the best balance between 16S rDNA  
331 assembly length and variants. LAST outputs were converted to sam files and processed  
332 with *samtools* [20] to build indexed bam files and obtain consensus sequences from  
333 alignments and variant calling. Read-mapping stats from sam files were calculated with  
334 the *ea-utils* package and its *sam-stats* function [21]. Different comparisons, GC content  
335 correlations, and plots were performed and drawn in R v3.2.0 [22]. Species coverage  
336 was calculated by obtaining fold-change ( $\text{Log}_2$ ) of species-specific read counting  
337 against the expected average for the entire community. A coverage bias was assumed  
338 when coverage deviation was lower than -1 or higher than 1. Taxonomy assignment of  
339 2d reads was performed using the Silva database [8] and the SINA aligner [20].  
340 Sequences were submitted to the SINA alignment web server using 80%, 70%, and 60%  
341 of identity thresholds to ensure a reliable identification. Additional identification at the  
342 species level was done using BLAST and the reference NCBI 16S rDNA database.

343 For the absolute quantification of 16S amplicons we used the following primers:  
344 *Escherichia coli* GGACGGGTGAGTAATGTCTGG and  
345 ACCTACTAGCTAATCCCATCTG; *Clostridium beijerinckii*  
346 AGAACCTTACCTAGACTTGACATC and GCTACTAACATAAGGGTTGCG; and  
347 *Bacteroides vulgatus* CACGGGTGAGTAACACGTATCC and  
348 GCATCCCCATCGTCTACCGGAA. Single-stranded DNA (ssDNA), fully covering  
349 the respective 16S rDNA regions to amplify for the *E. coli*, *C. beijerinckii*, and *B.*  
350 *vulgatus* species, was obtained from Isogen Life Science B.V (Utrecht, The  
351 Netherlands) where it was synthesized, PAGE-purified, and quantified and used in  
352 molecule titration for qPCR. The qPCR was performed on a LightCycler® 480  
353 instrument (Roche Life Science) using the SYBR Green I Master Mix reagent (Roche  
354 Life Science), 0.625µM oligos, and 1 µL of 1:20 diluted and purified PCR product  
355 generated with ‘universal primers’. After 35 cycles of amplification at 95°C for 10 s,  
356 64°C for 20 s, and 72°C for 15 s, absolute quantification was determined using  
357 LightCycler® 480 SW v1.5 software (Roche Life Science). Ct values were obtained  
358 from serial dilutions of respective ssDNA with known concentrations.

359

### 360 **Availability of supporting data**

361 Accessions for the 16S ribosomal RNA sequences for the species present in the mock  
362 community are available at GenBank: NC\_009085 range c3505652–3504124,  
363 NZ\_GG753639 range 96928–98455, NC\_003909 range 82453–83960, NC\_009614  
364 range c4744649–4743140, NC\_009617 range c5775228–5773724, NC\_001263 range  
365 c2287019–2285518, NC\_017316 range 213429–214977, NC\_000913 range 4208147–  
366 4209688, NC\_000915 range c1512634–1511137, NC\_008530 range c1560731–  
367 1559153, NC\_003210 range 243556–245041, NC\_003112 range c2137452–2415909,



368 NC\_006085 range 606163–607687, NC\_002516 range c6044743–6043208,  
369 NC\_007493 range 1–1463, NC\_010079 range c2003413–2001874, NC\_004461 range  
370 c1816154–1811601, NC\_004116 range 348575–350125, NC\_004350 range 185749–  
371 187300, and NC\_003028 range c1815064–1813505). Alternatively, a multi-fasta file  
372 containing the 16S reference sequences for the species included in the mock community  
373 is available at [https://github.com/alfbenpa/16S\\_MinION](https://github.com/alfbenpa/16S_MinION).

374 Further supporting data can be found in the *GigaScience* database, GigaDB [23].

375

### 376 **Abbreviations**

377 BLAST, Basic Local Alignment Tool; EC , European Commission; ENA, European  
378 Nucleotide Archive; HDF, Hierarchical Data Format; NCBI, National Center for  
379 Biotechnology Information; ONT, Oxford Nanopore Technologies; OTU, Operational  
380 Taxonomic Unit; PCR, Polymerase Chain Reaction; rDNA, DNA encoding for the  
381 Ribosomal RNA; rRNA, Ribosomal RNA; SINA, SILVA Incremental Aligner; USB,  
382 Universal Serial Bus; WIMP, What's In My Pot Metrichor Workflow.

383

### 384 **Competing interests**

385 ABP is part of the MinION™ Access Programme supported by ONT. Sequencing kits  
386 used in this research were partially donated by ONT.

387

### 388 **Authors' contributions**

389 ABP and YS designed the study and managed the project. ABP performed the  
390 experiments, and analysed and managed the data. ABP, KP, and YS wrote the  
391 manuscript. All authors read and approved the final manuscript.

392

393 **Acknowledgements**

394 Authors thank the European 7th Framework Programme for funding ABP and KP, who  
395 were supported by the EC Project no. 613979 (MyNewGut).

396

## 397 References

- 398 1. Quick J, Quinlan AR, Loman NJ: **A reference bacterial genome dataset**  
399 **generated on the MinION portable single-molecule nanopore sequencer.**  
400 *Gigascience* 2014, **3**:22.
- 401 2. Utturkar SM, Klingeman DM, Land ML, Schadt CW, Doktycz MJ, Pelletier  
402 DA, Brown SD: **Evaluation and validation of de novo and hybrid assembly**  
403 **techniques to derive high-quality genome sequences.** *Bioinformatics* 2014,  
404 **30**:2709-2716.
- 405 3. Loman NJ, Quinlan AR: **Poretools: a toolkit for analyzing nanopore**  
406 **sequence data.** *Bioinformatics* 2014, **30**:3399-3401.
- 407 4. Watson M, Thomson M, Risse J, Talbot R, Santoyo-Lopez J, Gharbi K, Blaxter  
408 M: **poRe: an R package for the visualization and analysis of nanopore**  
409 **sequencing data.** *Bioinformatics* 2014, **31**:114-115.
- 410 5. Klindworth A, Pruesse E, Schweer T, Peplies J, Quast C, Horn M, Glockner FO:  
411 **Evaluation of general 16S ribosomal RNA gene PCR primers for classical**  
412 **and next-generation sequencing-based diversity studies.** *Nucleic Acids Res*  
413 2012, **41**:e1.
- 414 6. Loy A, Maixner F, Wagner M, Horn M: **probeBase--an online resource for**  
415 **rRNA-targeted oligonucleotide probes: new features 2007.** *Nucleic Acids Res*  
416 2007, **35**:D800-804.
- 417 7. Pruesse E, Peplies J, Glockner FO: **SINA: accurate high-throughput multiple**  
418 **sequence alignment of ribosomal RNA genes.** *Bioinformatics* 2012, **28**:1823-  
419 1829.
- 420 8. Quast C, Pruesse E, Yilmaz P, Gerken J, Schweer T, Yarza P, Peplies J,  
421 Glockner FO: **The SILVA ribosomal RNA gene database project: improved**  
422 **data processing and web-based tools.** *Nucleic Acids Res* 2013, **41**:D590-596.
- 423 9. Koskinen K, Auvinen P, Bjorkroth KJ, Hultman J: **Inconsistent Denoising and**  
424 **Clustering Algorithms for Amplicon Sequence Data.** *J Comput Biol* 2014,  
425 **doi:10.1089/cmb.2014.0268.**
- 426 10. Schmidt TS, Matias Rodrigues JF, von Mering C: **Ecological consistency of**  
427 **SSU rRNA-based operational taxonomic units at a global scale.** *PLoS*  
428 *Comput Biol* 2014, **10**:e1003594.
- 429 11. Schmidt TS, Matias Rodrigues JF, von Mering C: **Limits to robustness and**  
430 **reproducibility in the demarcation of operational taxonomic units.** *Environ*  
431 *Microbiol* 2014, **doi:10.1111/1462-2920.12610.**
- 432 12. He Y, Caporaso JG, Jiang XT, Sheng HF, Huse SM, Rideout JR, Edgar RC,  
433 Kopylova E, Walters WA, Knight R, Zhou HW: **Stability of operational**  
434 **taxonomic units: an important but neglected property for analyzing**  
435 **microbial diversity.** *Microbiome* 2015, **3**:20.
- 436 13. Ashton PM, Nair S, Dallman T, Rubino S, Rabsch W, Mwaigwisya S, Wain J,  
437 O'Grady J: **MinION nanopore sequencing identifies the position and**  
438 **structure of a bacterial antibiotic resistance island.** *Nat Biotechnol* 2015,  
439 **33**:296-300.
- 440 14. Kilianski A, Haas JL, Corriveau EJ, Liem AT, Willis KL, Kadavy DR,  
441 Rosenzweig CN, Minot SS: **Bacterial and viral identification and**  
442 **differentiation by amplicon sequencing on the MinION nanopore**  
443 **sequencer.** *Gigascience* 2015, **4**:12.

- 444 15. Quick J, Ashton P, Calus S, Chatt C, Gossain S, Hawker J, Nair S, Neal K, Nye  
445 K, Peters T, et al: **Rapid draft sequencing and real-time nanopore**  
446 **sequencing in a hospital outbreak of Salmonella.** *Genome Biol* 2015, **16**:114.  
447 16. Mikheyev AS, Tin MM: **A first look at the Oxford Nanopore MinION**  
448 **sequencer.** *Mol Ecol Resour* 2014, **14**:1097-1102.  
449 17. DeSantis TZ, Hugenholtz P, Larsen N, Rojas M, Brodie EL, Keller K, Huber T,  
450 Dalevi D, Hu P, Andersen GL: **Greengenes, a chimera-checked 16S rRNA**  
451 **gene database and workbench compatible with ARB.** *Appl Environ*  
452 *Microbiol* 2006, **72**:5069-5072.  
453 18. <http://www.beiresources.org>  
454 19. Frith MC, Hamada M, Horton P: **Parameters for accurate genome alignment.**  
455 *BMC Bioinformatics* 2010, **11**:80.  
456 20. Li H, Handsaker B, Wysoker A, Fennell T, Ruan J, Homer N, Marth G,  
457 Abecasis G, Durbin R: **The Sequence Alignment/Map format and SAMtools.**  
458 *Bioinformatics* 2009, **25**:2078-2079.  
459 21. Aronesty E: **ea-utils: Command-line tools for processing biological**  
460 **sequencing data.** <http://code.google.com/p/ea-utils/>; 2011.  
461 22. <https://cran.r-project.org>  
462 23. Benitez-Paez A, Portune K, Sanz Y: **Supporting information for "Species-**  
463 **level resolution of 16S rRNA gene amplicons sequenced thorough MinION**  
464 **portable nanopore sequencer".** *GigaScience Database* 2016,  
465 <http://dx.doi.org/10.5524/100185>.  
466  
467

468

469 **Figure legends**

470

471 **Figure 1.** Species abundance in the mock community detected by MinION<sup>TM</sup>. Species  
472 coverage was calculated by obtaining the fold-change ( $\text{Log}_2$ ) of species-specific read  
473 counting against the expected average for the entire community. A coverage bias was  
474 assumed when coverage deviation was lower than -1 or higher than 1.

475

476 **Figure 2.** Sequencing coverage versus copies of respective 16S rRNA genes present in  
477 the starting material. Scatter plot of the coverage deviation calculated for *B. vulgatus*, *C.*  
478 *beijerinckii*, and *E. coli* against the calculated number of respective 16S copies present in  
479 the PCR sample used as starting material of the sequencing reaction.

480

481 **Figure 3.** Per-base accuracy of the mapped reads. (A) Scatter plot of the GC content  
482 observed in mapped reads against the GC obtained from the reference sequences. The  
483 dashed line indicates a correlation with Pearson's  $r = 1$ . (B) Correlation between the GC  
484 content observed in mapped reads and coverage bias observed in Figure 1. (C) Influence  
485 of the GC content observed in mapped reads on mismatch rates calculated after  
486 mapping. (D) Scatter plot of the observed GC content of mapped reads and indel rates  
487 calculated after mapping. In all cases the Pearson's  $r$  coefficients and  $p$  values  
488 supporting such correlations are presented inside the scatter plots and solid lines  
489 indicate the tendency of correlations.

*Streptococcus pneumoniae*  
*Streptococcus mutans*  
*Streptococcus agalactiae*  
*Staphylococcus aureus*  
*Staphylococcus epidermidis*  
*Rhodobacter sphaeroides*  
*Pseudomonas aeruginosa*  
*Propionibacterium acnes*  
*Neisseria meningitidis*  
*Listeria monocytogenes*  
*Lactobacillus gasseri*  
*Helicobacter pylori*  
*Escherichia coli*  
*Enterococcus faecalis*  
*Deinococcus radiodurans*  
*Clostridium beijerinckii*  
*Bacteroides vulgatus*  
*Bacillus cereus*  
*Actinomyces odontolyticus*  
*Acinetobacter baumannii*

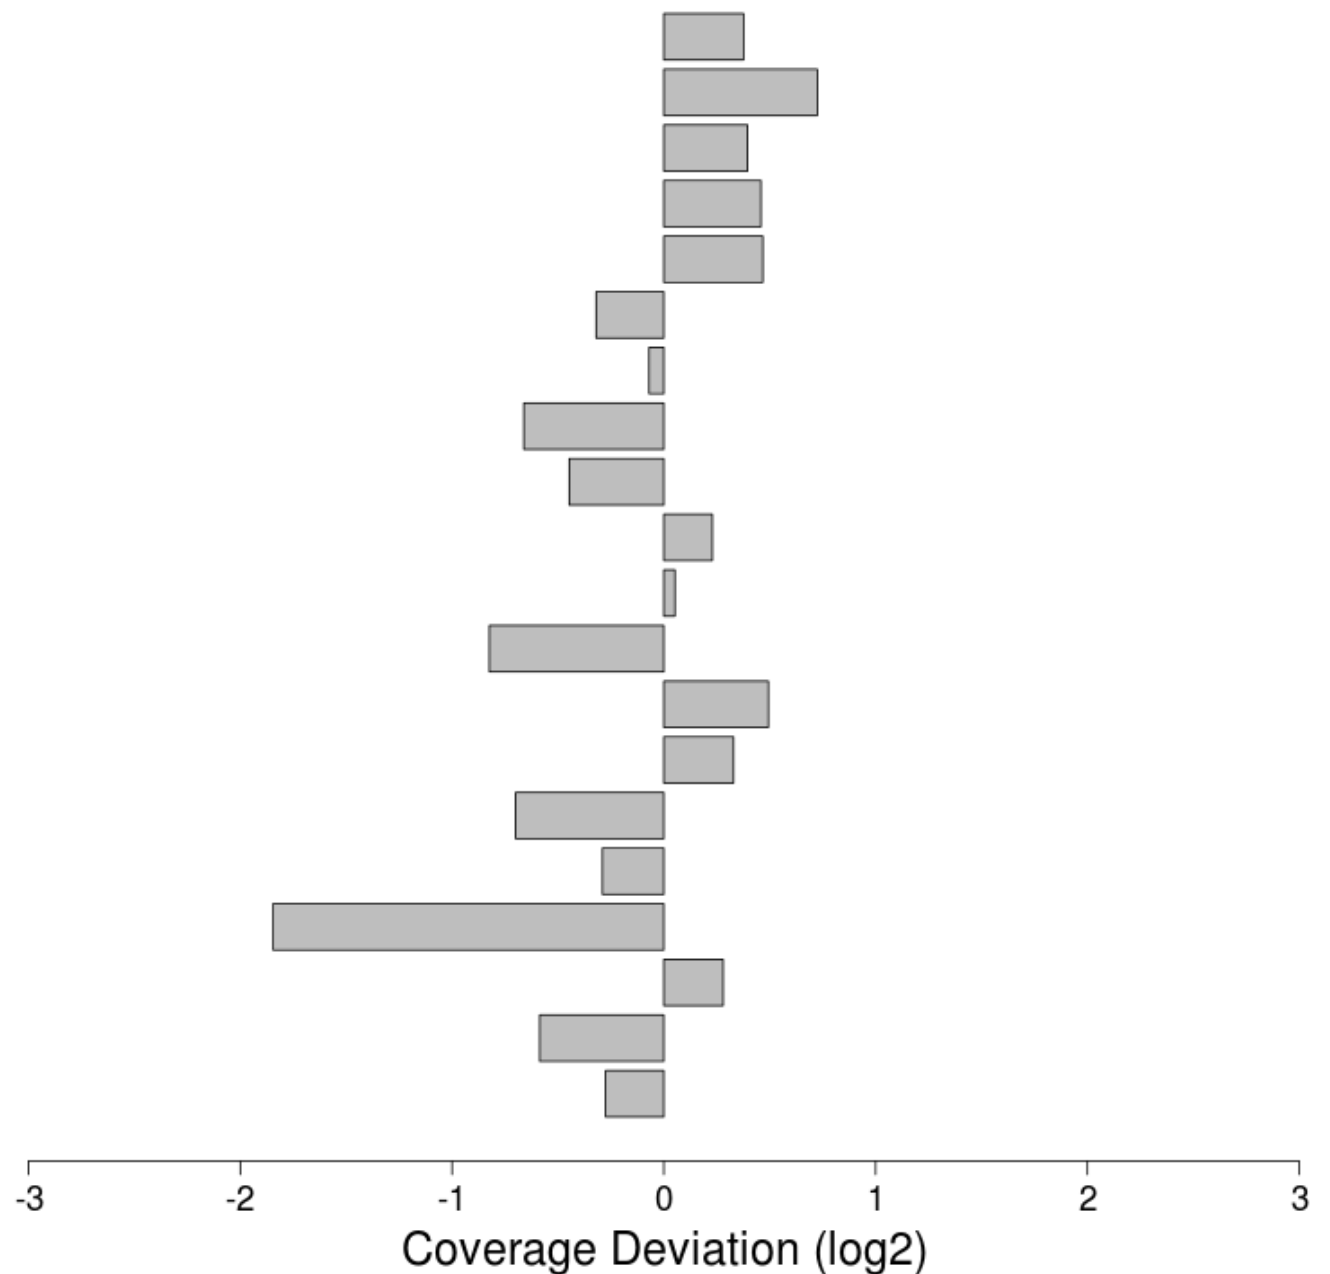

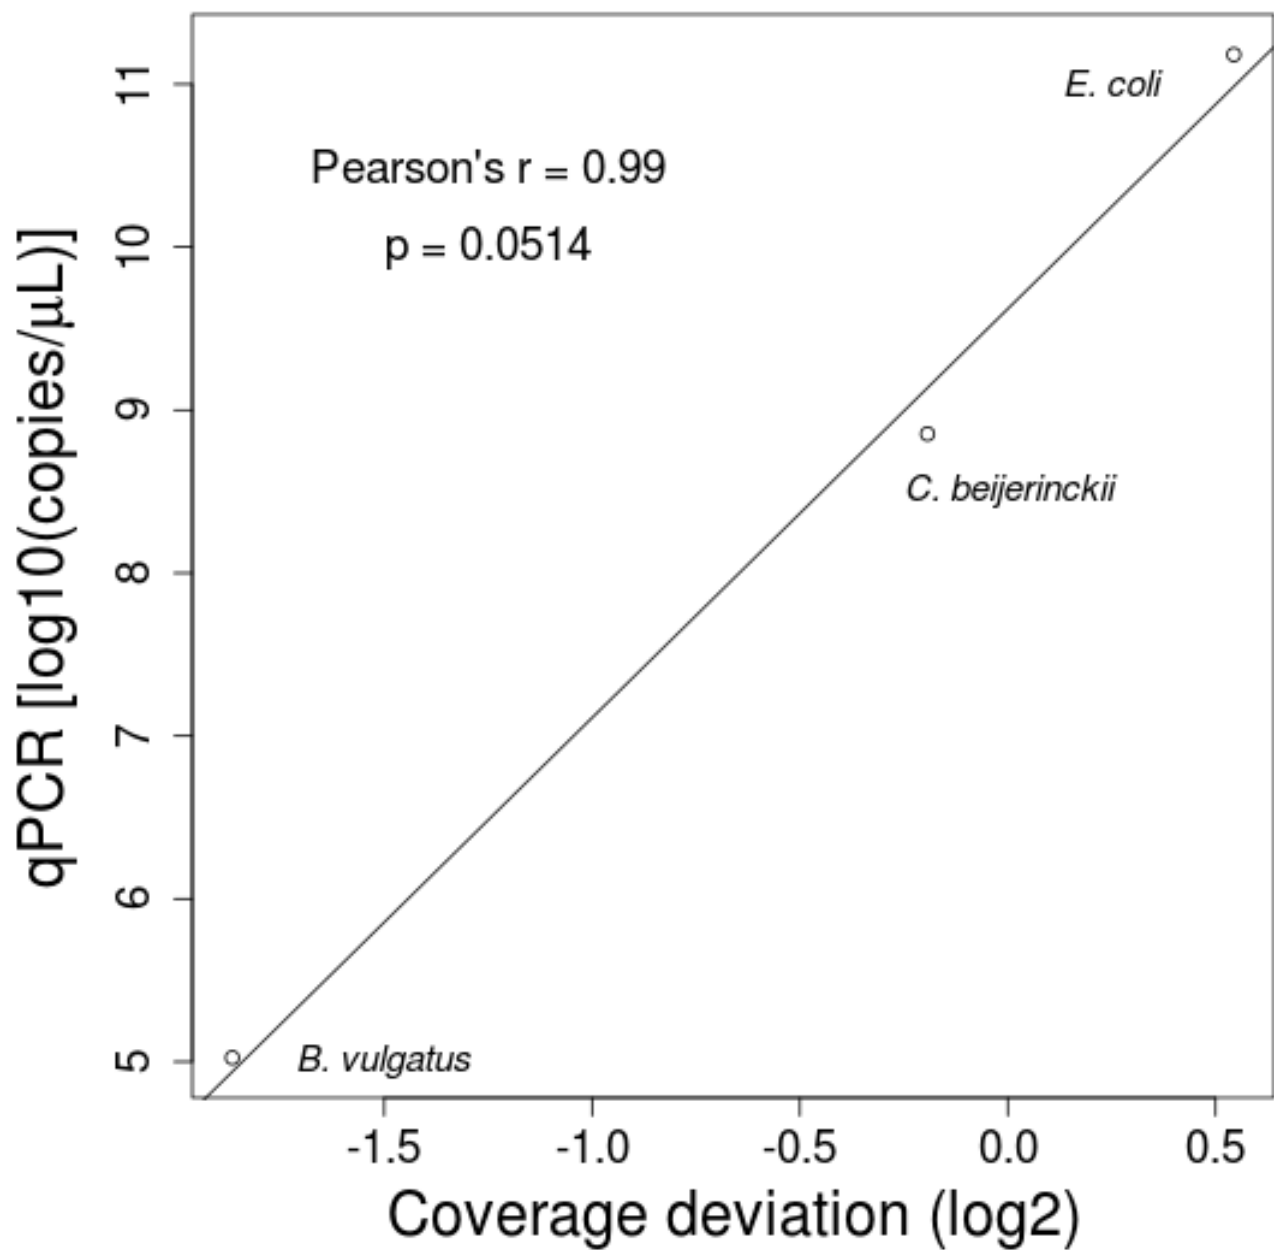

**A**

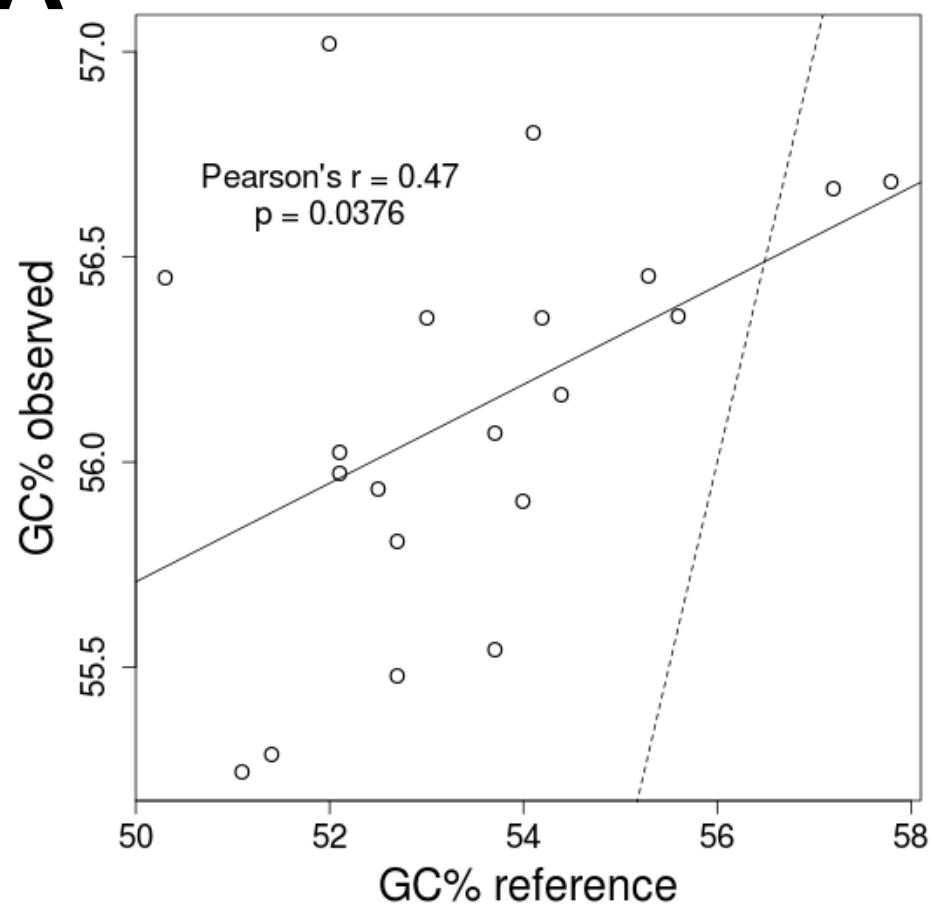

**B**

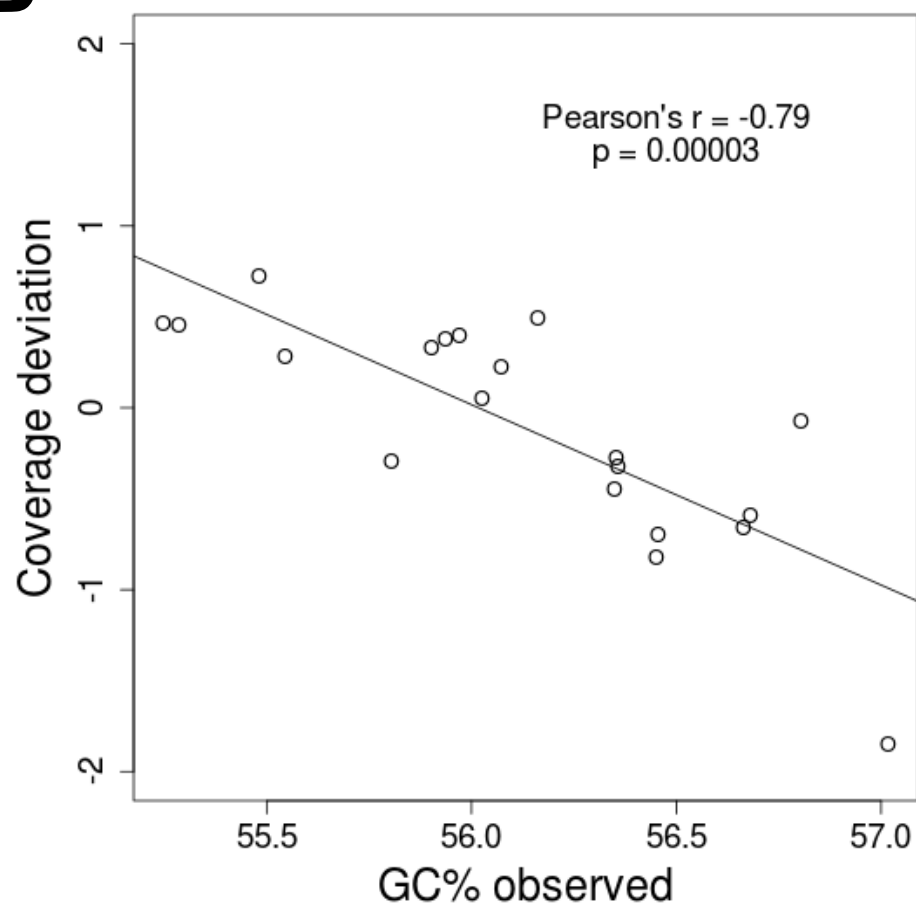

**C**

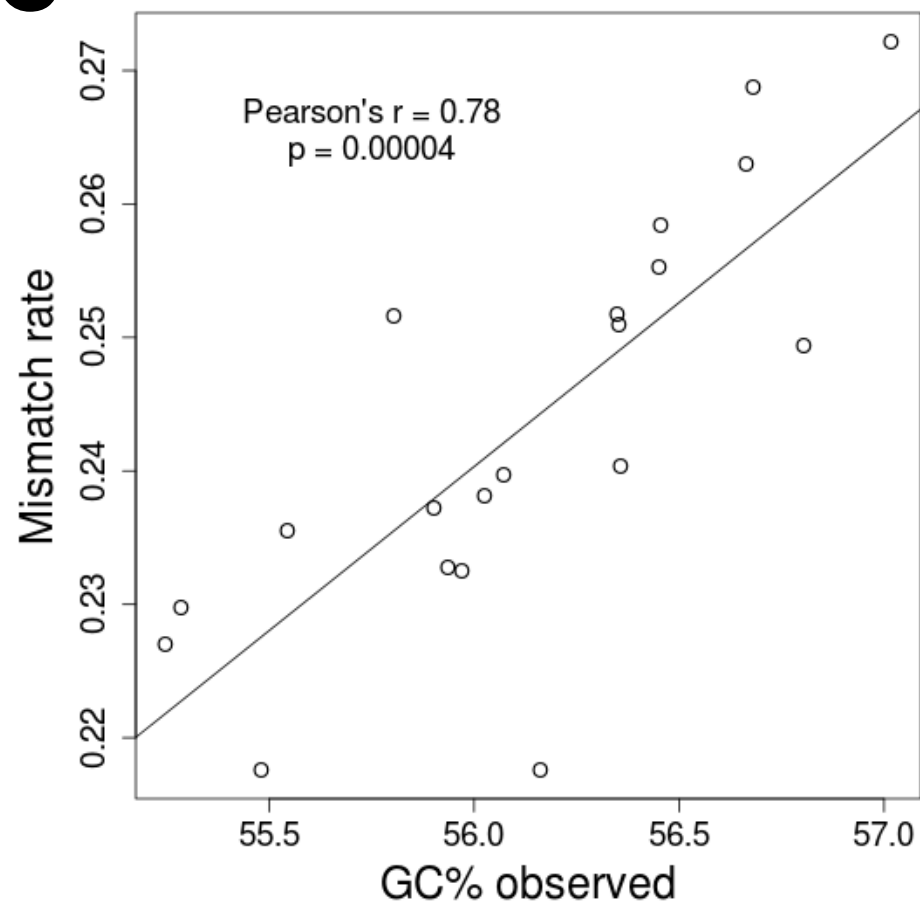

**D**

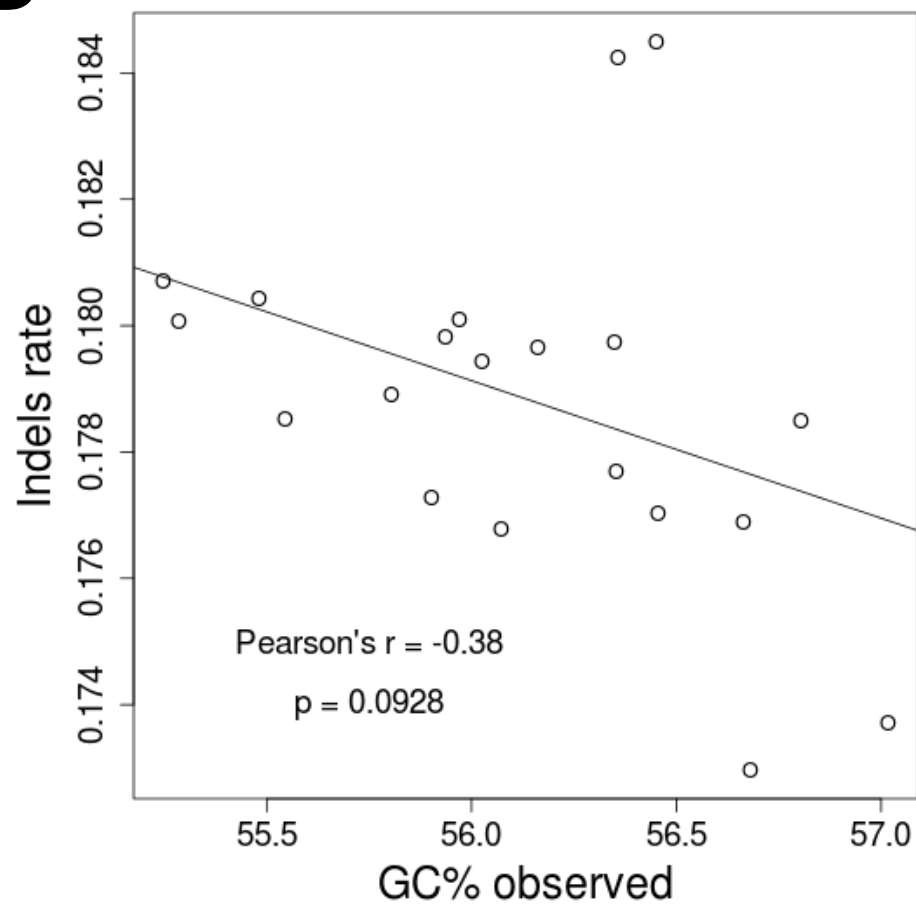

Source: http://biorxiv.org/content/10.1101/021758v2.full.pdf
